# Supplementary material for: Tryptanthrin derivative copper(ii) complexes with high antitumor activity by inhibiting telomerase activity, and inducing mitochondria-mediated apoptosis and S-phase arrest in BEL-7402
Source: Royal Society of Chemistry journal article supplement (doi:10.1039/c8nj03005g), 2018-01-01
Supplement: c8nj03005g1.pdf [file c8nj03005g1.pdf]

Electronic Supporting Information Materials

**Tryptanthrin derivatives copper(II) complexes with high antitumor activity by inhibiting telomerase activity, and inducing mitochondria-mediated apoptosis and S-phase arrest in BEL-7402**

Qi-Pin Qin <sup>a,c,1</sup>, Bi-Qun Zou <sup>b,c,1</sup>, Ming-Xiong Tan <sup>a,\*</sup>, Shu-Long Wang <sup>a,c</sup>, Yan-Cheng Liu <sup>c</sup> and Hong Liang <sup>c,\*</sup>

**Table S1.** Crystal data and structure refinement details for **Try-Cu**.

|                                             |                                                                                 |
|---------------------------------------------|---------------------------------------------------------------------------------|
| Empirical formula                           | C <sub>30</sub> H <sub>16</sub> Cl <sub>2</sub> CuN <sub>4</sub> O <sub>4</sub> |
| Formula weight                              | 630.91                                                                          |
| Temperature/K                               | 293(2)                                                                          |
| Crystal system                              | triclinic                                                                       |
| Space group                                 | P-1                                                                             |
| a/Å                                         | 7.8422(3)                                                                       |
| b/Å                                         | 8.7783(3)                                                                       |
| c/Å                                         | 9.4903(3)                                                                       |
| α/°                                         | 90.286(2)                                                                       |
| β/°                                         | 104.150(2)                                                                      |
| γ/°                                         | 97.796(2)                                                                       |
| Volume/Å <sup>3</sup>                       | 627.15(4)                                                                       |
| Z                                           | 1                                                                               |
| ρ <sub>calc</sub> /mg/mm <sup>3</sup>       | 1.670                                                                           |
| m/mm <sup>-1</sup>                          | 1.132                                                                           |
| F(000)                                      | 319.0                                                                           |
| Crystal size/mm <sup>3</sup>                | 0.41 × 0.23 × 0.12                                                              |
| 2θ range for data collection                | 4.42 to 52.72°                                                                  |
| Index ranges                                | -9 ≤ h ≤ 9, -10 ≤ k ≤ 10, -11 ≤ l ≤ 11                                          |
| Reflections collected                       | 9770                                                                            |
| Independent reflections                     | 2554[R(int) = 0.0234]                                                           |
| Data/restraints/parameters                  | 2554/0/187                                                                      |
| Goodness-of-fit on F <sup>2</sup>           | 1.067                                                                           |
| Final R indexes [I ≥ 2σ(I)]                 | R <sub>1</sub> = 0.0300, wR <sub>2</sub> = 0.0780                               |
| Final R indexes [all data]                  | R <sub>1</sub> = 0.0377, wR <sub>2</sub> = 0.0824                               |
| Largest diff. peak/hole / e Å <sup>-3</sup> | 0.64/-0.32                                                                      |

<sup>a</sup>  $R_1 = \frac{\sum ||F_o| - |F_c||}{\sum |F_o|}$ ; <sup>b</sup>  $wR_2 = [\frac{\sum w(F_o^2 - F_c^2)^2}{\sum w(F_o^2)^2}]^{1/2}$ .

**Table S2.** Selected bond lengths (Å) for Try-Cu.

| Atom | Atom | Length/Å | Atom | Atom             | Length/Å   |
|------|------|----------|------|------------------|------------|
| C1   | C2   | 1.384(3) | C9   | C10              | 1.458(3)   |
| C1   | C6   | 1.387(3) | C9   | O2               | 1.213(3)   |
| C2   | C3   | 1.389(3) | C10  | C11              | 1.399(3)   |
| C3   | C4   | 1.373(4) | C10  | C15              | 1.385(3)   |
| C4   | C5   | 1.397(3) | C11  | C12              | 1.380(3)   |
| C5   | C6   | 1.409(3) | C11  | N2               | 1.435(3)   |
| C5   | C7   | 1.467(3) | C12  | C13              | 1.392(3)   |
| C6   | N1   | 1.408(3) | Cu1  | O1 <sup>1</sup>  | 2.7070(16) |
| C7   | N2   | 1.399(3) | Cu1  | O1               | 2.7070(16) |
| C7   | O1   | 1.213(3) | Cl1  | Cu1              | 2.2420(6)  |
| C8   | C9   | 1.509(3) | Cu1  | Cl1 <sup>1</sup> | 2.2420(6)  |
| C8   | N1   | 1.284(3) | Cu1  | N1               | 2.0790(17) |
| C8   | N2   | 1.377(2) | Cu1  | N1 <sup>1</sup>  | 2.0790(17) |

**Table S3.** Selected bond angles (°) for Try-Cu.

| Atom | Atom | Atom | Angle/°    | Atom            | Atom | Atom             | Angle/°    |
|------|------|------|------------|-----------------|------|------------------|------------|
| C2   | C1   | C6   | 119.7(2)   | C15             | C10  | C11              | 120.84(19) |
| C1   | C2   | C3   | 120.6(2)   | C10             | C11  | N2               | 109.44(17) |
| C4   | C3   | C2   | 120.3(2)   | C12             | C11  | C10              | 121.8(2)   |
| C3   | C4   | C5   | 120.1(2)   | C12             | C11  | N2               | 128.7(2)   |
| C4   | C5   | C6   | 119.5(2)   | C11             | C12  | C13              | 116.6(2)   |
| C4   | C5   | C7   | 118.98(19) | C14             | C13  | C12              | 122.3(2)   |
| C6   | C5   | C7   | 121.49(19) | C13             | C14  | C15              | 120.7(2)   |
| C1   | C6   | C5   | 119.9(2)   | C10             | C15  | C14              | 117.8(2)   |
| C1   | C6   | N1   | 119.51(18) | Cl1             | Cu1  | Cl1 <sup>1</sup> | 180.00(3)  |
| N1   | C6   | C5   | 120.59(19) | N1 <sup>1</sup> | Cu1  | Cl1              | 90.38(5)   |
| N2   | C7   | C5   | 112.26(17) | N1              | Cu1  | Cl1              | 89.62(5)   |
| O1   | C7   | C5   | 126.3(2)   | N1              | Cu1  | Cl1 <sup>1</sup> | 90.38(5)   |
| O1   | C7   | N2   | 121.4(2)   | N1 <sup>1</sup> | Cu1  | Cl1 <sup>1</sup> | 89.62(5)   |
| N1   | C8   | C9   | 125.62(18) | N1 <sup>1</sup> | Cu1  | N1               | 180.0      |
| N1   | C8   | N2   | 126.2(2)   | C6              | N1   | Cu1              | 127.15(14) |
| N2   | C8   | C9   | 108.09(17) | C8              | N1   | C6               | 116.69(17) |
| C10  | C9   | C8   | 104.88(17) | C8              | N1   | Cu1              | 115.95(14) |
| O2   | C9   | C8   | 123.29(19) | C7              | N2   | C11              | 128.21(17) |
| O2   | C9   | C10  | 131.8(2)   | C8              | N2   | C7               | 122.60(18) |
| C11  | C10  | C9   | 108.41(19) | C8              | N2   | C11              | 109.14(17) |
| C15  | C10  | C9   | 130.7(2)   |                 |      |                  |            |

**Table S4.** Crystal data and structure refinement details for **BrTry-Cu**.

|                                             |                                                                                                 |
|---------------------------------------------|-------------------------------------------------------------------------------------------------|
| Empirical formula                           | C <sub>30</sub> H <sub>14</sub> Br <sub>2</sub> Cl <sub>2</sub> CuN <sub>4</sub> O <sub>4</sub> |
| Formula weight                              | 788.71                                                                                          |
| Temperature/K                               | 296.15                                                                                          |
| Crystal system                              | monoclinic                                                                                      |
| Space group                                 | P2 <sub>1</sub> /c                                                                              |
| a/Å                                         | 10.8609(12)                                                                                     |
| b/Å                                         | 13.7631(15)                                                                                     |
| c/Å                                         | 18.269(2)                                                                                       |
| α/°                                         | 90.00                                                                                           |
| β/°                                         | 97.096(5)                                                                                       |
| γ/°                                         | 90.00                                                                                           |
| Volume/Å <sup>3</sup>                       | 2709.9(5)                                                                                       |
| Z                                           | 4                                                                                               |
| ρ <sub>calc</sub> /mg/mm <sup>3</sup>       | 1.933                                                                                           |
| m/mm <sup>-1</sup>                          | 4.000                                                                                           |
| F(000)                                      | 1548.0                                                                                          |
| Crystal size/mm <sup>3</sup>                | 0.21 × 0.13 × 0.12                                                                              |
| 2θ range for data collection                | 3.72 to 52.74°                                                                                  |
| Index ranges                                | -13 ≤ h ≤ 13, -15 ≤ k ≤ 17, -22 ≤ l ≤ 22                                                        |
| Reflections collected                       | 19518                                                                                           |
| Independent reflections                     | 5501[R(int) = 0.0921]                                                                           |
| Data/restraints/parameters                  | 5501/0/388                                                                                      |
| Goodness-of-fit on F <sup>2</sup>           | 1.041                                                                                           |
| Final R indexes [I ≥ 2σ(I)]                 | R <sub>1</sub> = 0.0944, wR <sub>2</sub> = 0.2623                                               |
| Final R indexes [all data]                  | R <sub>1</sub> = 0.1780, wR <sub>2</sub> = 0.3087                                               |
| Largest diff. peak/hole / e Å <sup>-3</sup> | 3.47/-0.77                                                                                      |

<sup>a</sup>  $R_1 = \frac{\sum ||F_o| - |F_c||}{\sum |F_o|}$ ; <sup>b</sup>  $wR_2 = [\frac{\sum w(F_o^2 - F_c^2)^2}{\sum w(F_o^2)^2}]^{1/2}$ .

**Table S5.** Selected bond lengths (Å) for **BrTry-Cu**.

| <b>Atom</b> | <b>Atom</b> | <b>Length/Å</b> | <b>Atom</b> | <b>Atom</b> | <b>Length/Å</b> |
|-------------|-------------|-----------------|-------------|-------------|-----------------|
| Br1         | C1          | 1.889(12)       | C16         | C21         | 1.407(16)       |
| Br2         | C16         | 1.905(13)       | C17         | C18         | 1.336(17)       |
| C1          | C2          | 1.356(16)       | C18         | C19         | 1.418(17)       |
| C1          | C6          | 1.415(16)       | C19         | C20         | 1.403(17)       |
| C2          | C3          | 1.395(17)       | C19         | N1          | 1.389(15)       |
| C3          | C4          | 1.390(16)       | C20         | C21         | 1.388(16)       |
| C4          | C5          | 1.373(17)       | C20         | C23         | 1.430(16)       |
| C4          | N3          | 1.432(16)       | C22         | C23         | 1.518(16)       |
| C5          | C6          | 1.375(16)       | C22         | N1          | 1.392(14)       |
| C5          | C7          | 1.457(17)       | C22         | N2          | 1.262(15)       |
| C7          | C8          | 1.449(17)       | C23         | O1          | 1.218(13)       |
| C7          | O4          | 1.220(13)       | C24         | C25         | 1.398(17)       |
| C8          | N3          | 1.379(14)       | C24         | N1          | 1.420(15)       |
| C8          | N4          | 1.326(15)       | C24         | O2          | 1.264(14)       |
| C9          | C10         | 1.425(18)       | C25         | C26         | 1.420(16)       |
| C9          | N3          | 1.397(15)       | C25         | C30         | 1.427(16)       |
| C9          | O3          | 1.215(14)       | C26         | C27         | 1.265(16)       |
| C10         | C11         | 1.432(17)       | C27         | C28         | 1.392(17)       |
| C10         | C15         | 1.430(18)       | C28         | C29         | 1.394(16)       |
| C11         | C12         | 1.305(17)       | O1          | Cu1         | 2.8945(91)      |
| C11         | N4          | 1.443(16)       | O2          | Cu1         | 2.7384(74)      |
| C12         | C13         | 1.390(17)       | Cl1         | Cu1         | 2.220(3)        |
| C13         | C14         | 1.398(18)       | Cl2         | Cu1         | 2.225(3)        |
| C14         | C15         | 1.380(18)       | Cu1         | N2          | 2.069(9)        |
| C16         | C17         | 1.374(17)       | Cu1         | N4          | 2.068(10)       |

**Table S6.** Selected bond angles (°) for **BrTry-Cu**.

| <b>Atom Atom Atom</b> | <b>Angle/°</b> | <b>Atom Atom Atom</b> | <b>Angle/°</b> |
|-----------------------|----------------|-----------------------|----------------|
| C2 C1 Br1             | 120.5(9)       | C21 C20 C19           | 122.7(11)      |
| C2 C1 C6              | 120.4(12)      | C21 C20 C23           | 129.5(12)      |
| C6 C1 Br1             | 118.9(10)      | C20 C21 C16           | 115.4(11)      |
| C1 C2 C3              | 122.9(12)      | N1 C22 C23            | 105.5(10)      |
| C4 C3 C2              | 115.6(12)      | N2 C22 C23            | 126.9(10)      |
| C3 C4 N3              | 127.7(12)      | N2 C22 N1             | 127.5(11)      |
| C5 C4 C3              | 122.6(13)      | C20 C23 C22           | 106.2(11)      |
| C5 C4 N3              | 109.5(10)      | O1 C23 C20            | 132.5(12)      |
| C4 C5 C6              | 121.0(11)      | O1 C23 C22            | 121.3(11)      |
| C4 C5 C7              | 108.5(11)      | C25 C24 N1            | 114.1(10)      |
| C6 C5 C7              | 130.5(11)      | O2 C24 C25            | 128.6(12)      |
| C5 C6 C1              | 117.4(11)      | O2 C24 N1             | 117.3(12)      |
| C8 C7 C5              | 104.7(11)      | C24 C25 C26           | 122.1(11)      |
| O4 C7 C5              | 130.1(12)      | C24 C25 C30           | 123.4(11)      |
| O4 C7 C8              | 125.2(12)      | C26 C25 C30           | 114.5(12)      |
| N3 C8 C7              | 109.9(11)      | C27 C26 C25           | 124.8(12)      |
| N4 C8 C7              | 127.3(11)      | C26 C27 C28           | 119.9(12)      |
| N4 C8 N3              | 122.8(11)      | C27 C28 C29           | 120.5(12)      |
| N3 C9 C10             | 113.8(11)      | C30 C29 C28           | 118.5(11)      |
| O3 C9 C10             | 124.7(12)      | C29 C30 C25           | 121.8(11)      |
| O3 C9 N3              | 121.5(12)      | C29 C30 N2            | 120.1(11)      |
| C9 C10 C11            | 123.0(12)      | N2 C30 C25            | 118.1(11)      |
| C9 C10 C15            | 121.6(12)      | Cl1 Cu1 Cl2           | 178.12(13)     |
| C15 C10 C11           | 115.2(12)      | N2 Cu1 Cl1            | 92.2(3)        |
| C10 C11 N4            | 117.4(12)      | N2 Cu1 Cl2            | 86.5(3)        |
| C12 C11 C10           | 123.2(12)      | N4 Cu1 Cl1            | 90.9(3)        |
| C12 C11 N4            | 119.4(11)      | N4 Cu1 Cl2            | 90.4(3)        |
| C11 C12 C13           | 119.5(12)      | N4 Cu1 N2             | 176.8(4)       |
| C12 C13 C14           | 122.9(14)      | C19 N1 C22            | 110.3(10)      |
| C15 C14 C13           | 116.1(13)      | C19 N1 C24            | 130.2(10)      |
| C14 C15 C10           | 123.0(13)      | C22 N1 C24            | 119.1(10)      |
| C17 C16 Br2           | 121.2(10)      | C22 N2 C30            | 117.5(10)      |
| C17 C16 C21           | 122.2(12)      | C22 N2 Cu1            | 116.1(8)       |
| C21 C16 Br2           | 116.5(10)      | C30 N2 Cu1            | 124.4(8)       |
| C18 C17 C16           | 122.3(12)      | C8 N3 C4              | 107.2(10)      |
| C17 C18 C19           | 118.6(12)      | C8 N3 C9              | 123.8(11)      |
| C20 C19 C18           | 118.9(13)      | C9 N3 C4              | 128.8(10)      |
| N1 C19 C18            | 130.7(12)      | C8 N4 C11             | 118.7(10)      |

|     |     |     |           |     |    |     |          |
|-----|-----|-----|-----------|-----|----|-----|----------|
| N1  | C19 | C20 | 110.3(10) | C8  | N4 | Cu1 | 118.2(8) |
| C19 | C20 | C23 | 107.7(11) | C11 | N4 | Cu1 | 122.5(8) |

**Table S7.** Inhibitory rates (%) of  $\text{CuCl}_2 \cdot 2\text{H}_2\text{O}$ , cisplatin, Try, BrTry and the corresponding complexes **Try-Cu** and **BrTry-Cu** toward on the selected five human cells for 48 h.

| Compounds                                              | T-24       | BEL-7402   | HepG2      | MGC80-3    | HL-7702    |
|--------------------------------------------------------|------------|------------|------------|------------|------------|
| Try <sup>a</sup>                                       | 20.19±1.78 | 40.23±0.26 | 30.25±0.59 | 38.67±1.46 | 34.03±1.27 |
| <b>Try-Cu</b> <sup>a</sup>                             | 80.00±0.62 | 85.16±0.58 | 49.73±1.07 | 71.46±1.19 | 40.25±2.11 |
| BrTry <sup>a</sup>                                     | 60.26±0.91 | 48.87±0.68 | 35.81±0.57 | 41.27±0.34 | 39.54±0.55 |
| <b>BrTry-Cu</b> <sup>a</sup>                           | 37.70±2.01 | 46.93±1.60 | 39.69±1.28 | 41.91±1.10 | 37.46±0.63 |
| $\text{CuCl}_2 \cdot 2\text{H}_2\text{O}$ <sup>b</sup> | 30.12±1.16 | 35.06±2.18 | 25.49±0.54 | 29.47±0.23 | 30.74±1.85 |
| Cisplatin <sup>a,c</sup>                               | 60.12±1.19 | 56.03±1.02 | 57.45±0.61 | 61.52±0.58 | 58.11±1.39 |

Results represent mean ± SD of at least six independent experiments. SD represents the standard deviation. <sup>a</sup> The concentration is 20  $\mu\text{M}$ . <sup>b</sup> The concentration is 100  $\mu\text{M}$ . <sup>c</sup>

Cisplatin was dissolved at a concentration of 1.0 mM in 0.154 M NaCl.

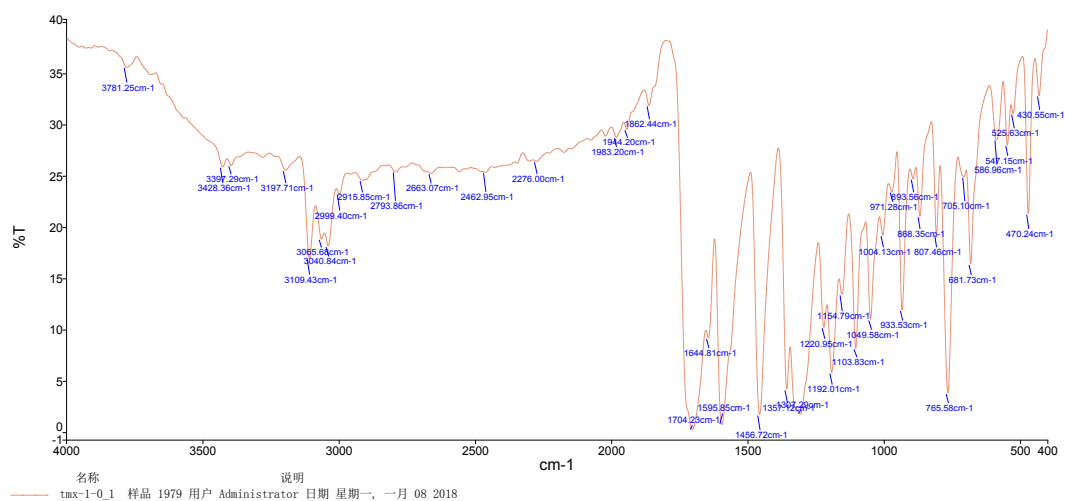

Fig. S1. IR (KBr) spectra of **Try-Cu**

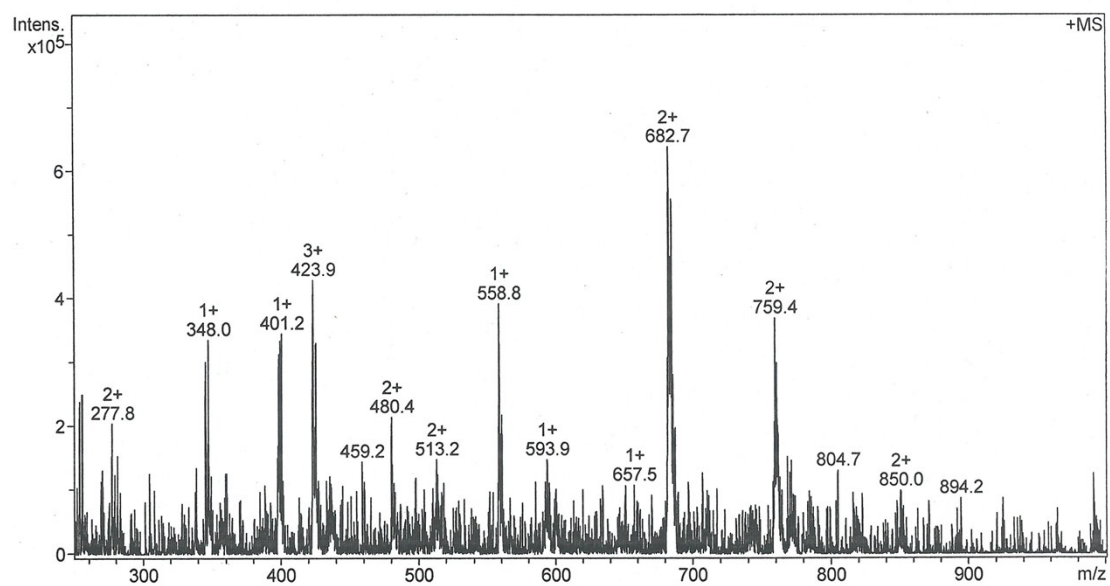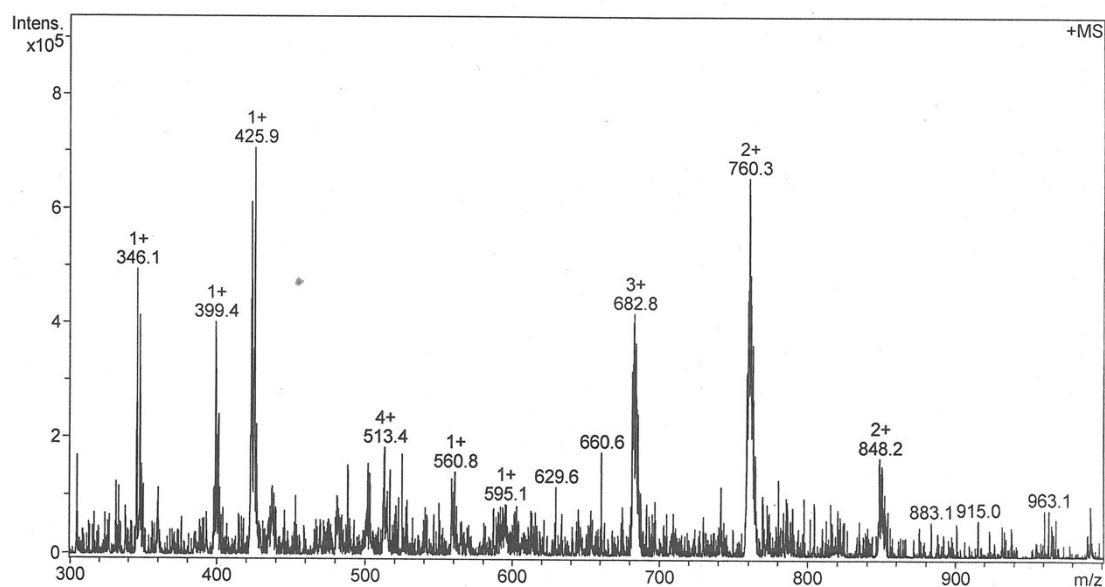

Fig. S2. The mass spectra of **Try-Cu** in Tris-HCl buffer solution (containing 5% DMSO) for 0 h (top) and 48 h (down), respectively.



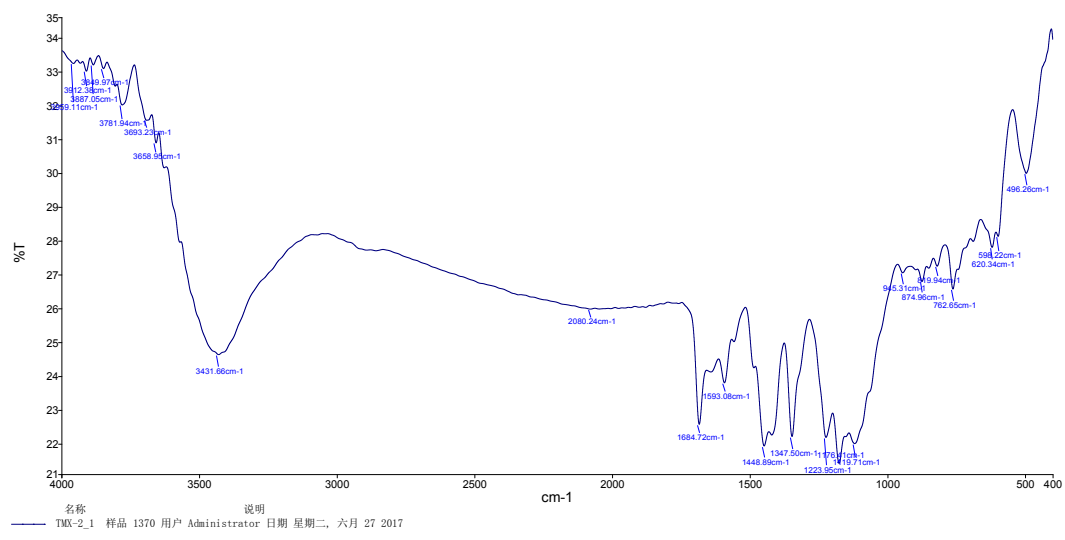

Fig. S3. IR (KBr) spectra of **BrTry-Cu**.

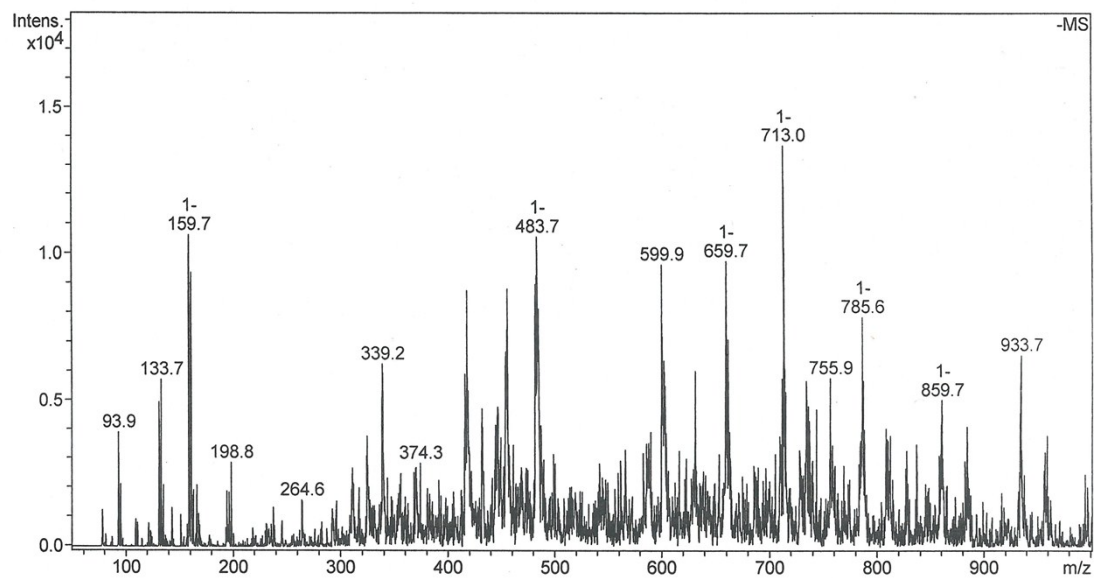

Fig. S4. The mass spectra of **BrTry-Cu** in Tris-HCl buffer solution (containing 5% DMSO) for 0 h.

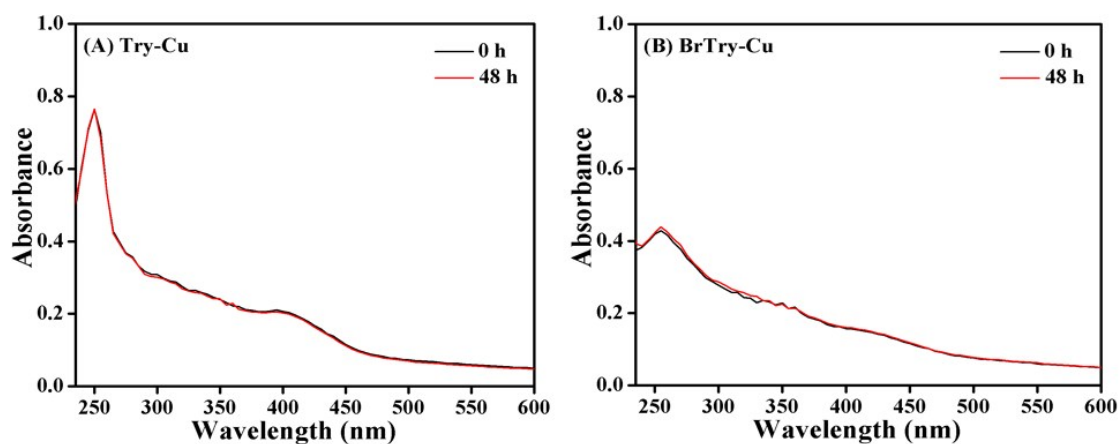

Fig. S5. UV-Vis absorption spectra of **Try-Cu** and **BrTry-Cu** ( $2.0 \times 10^{-5}$  M) in TBS (Tris-HCl buffer solution, 10 mM, pH 7.35) solution in the time course 0 and 48 h, respectively.

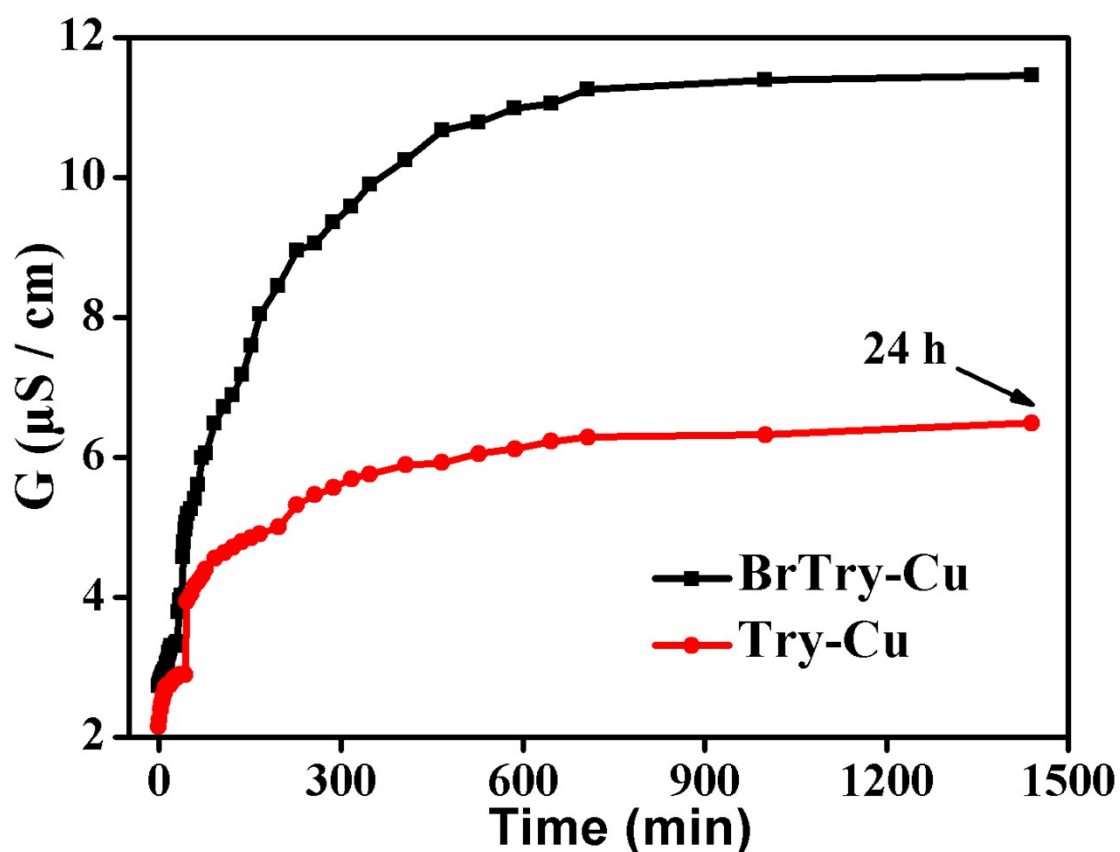

Fig. S6. The variations on the conductivity of **Try-Cu** ( $4.0 \mu\text{M}$ ) and **BrTry-Cu** ( $30.9 \mu\text{M}$ ) in cellular lysate (BEL-7402 cells) at  $37^\circ\text{C}$ , shown as the average value in a

triplicate experiment, which indicated that it would dissociate in TBS to give the species of **Try-Cu** (4.0  $\mu\text{M}$ ) and **BrTry-Cu** (30.9  $\mu\text{M}$ ), as suggested by the stability results of UV-Vis and ESI-MS spectroscopy.

### Abbreviations

---

|                  |                                                                      |
|------------------|----------------------------------------------------------------------|
| TBS              | Tris-HCl buffer                                                      |
| MTT              | 3-(4,5-dimethylthiazol-2-yl)-2,5-diphenyltetrazolium bromide         |
| ROS              | reactive oxygen species                                              |
| IC <sub>50</sub> | half maximal inhibitory concentration                                |
| T-24 cells       | human bladder cancer cells                                           |
| BEL-7402 cells   | human hepatoma cells                                                 |
| HepG2 cells      | human hepatocellular carcinoma cells                                 |
| MGC80-3 cells    | human gastric cancer cells                                           |
| HL-7702 cells    | human normal hepatocytes cells                                       |
| PI               | propidium iodide                                                     |
| $\Delta\psi$     | mitochondrial membrane potential                                     |
| JC-1             | 5,5',6,6'-tetrachloro-1,1',3,3'-tetraethylbenzimidazolylcarbocyanine |

---
